# Supplementary material for: Compound CAR T-cells as a double-pronged approach for treating acute myeloid leukemia
Source: PubMed Central journal article supplement (PMC5990523; doi:10.1038/s41375-018-0075-3), 2018-02-25

Figure S4

123b-33bcCAR co-culture percent lysis summaries

A. Leukemia Cell Lines

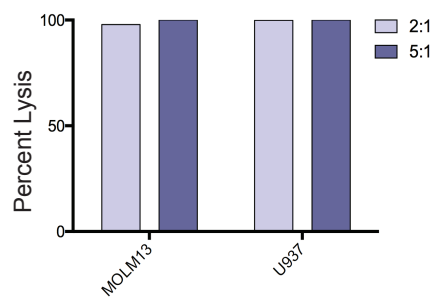

B. Artificial Cell Lines

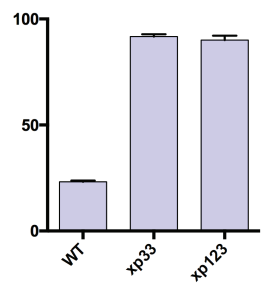

C. Leukemia Patient Samples

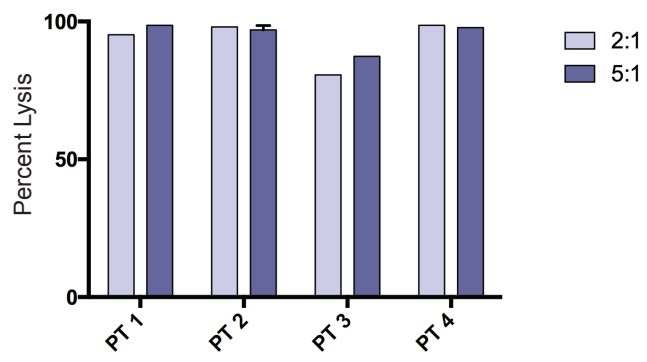

Supplement: 41375_2018_75_MOESM6_ESM.pdf [file 41375_2018_75_MOESM6_ESM.pdf]
